# Supplementary material
Source: publisher figshare collection journal article supplement (https://asha.figshare.com/articles/dataset/_/21401778)
Supplement: Supplementary file 1 [file 1]

## Supplemental Material S2. REDCap SLP rating survey of motor speech impairment.

### Part 1: Preliminary Motor Speech Ratings

In the Dropbox folder entitled "SLP ratings Paper 3," go into the 'P01' folder, and then into the 'Part 1 - Preliminary Motor Speech Ratings' subfolder.

Please listen to the following audio files:

- Picture description
- AMR
- SMR

Please rate the overall severity of motor speech impairment

- ☐ **Normal:** Speech is natural-sounding, fluent, and effortless. Normal articulation, pitch, loudness, voice quality, resonance, prosody (incl. rate), and respiration.
- ☐ **Questionable/very mild impairment:** Occasional misarticulation and/or effortful or halting speech (not due to word-finding); very mild or inconsistent impairment in pitch, loudness, voice quality, resonance, prosody (incl. rate), or respiration.
- ☐ **Mild impairment:** Mild and consistent impairment in articulation, pitch, loudness, voice quality, resonance, prosody (incl. rate), or respiration. May exhibit occasional unintelligible words or utterances.
- ☐ **Moderate impairment:** Moderate impairment in articulation, pitch, loudness, voice quality, resonance, prosody (incl. rate), or respiration. Frequent unintelligible words or utterances.
- ☐ **Severe impairment:** Severe impairments in articulation, pitch, loudness, voice quality, resonance, prosody (incl. rate), or respiration. The majority of words or phrases are unintelligible.

[reset](#)

How intelligible is this participant's speech?

Completely  
unintelligible

Completely  
intelligible

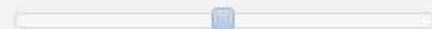

Change the slider above to set a response

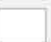

[reset](#)
