# Supplementary material
Source: publisher figshare collection journal article supplement (https://asha.figshare.com/articles/dataset/_/21401778)
Supplement: Supplementary file 2 [file 1]

**Supplemental Material S4.** Detailed summary of auditory-perceptual ratings of motor speech impairment.

| Group                 | Case | Syndrome dx | SIT score (%) | Overall MSI severity | AOS severity | Dysarthria severity | Auditory-perceptual MSI predominance (AOS <sup>+</sup> , Dys <sup>+</sup> ) <sup>a</sup> | Salient motor speech features <sup>b</sup>                                                                                                                             |
|-----------------------|------|-------------|---------------|----------------------|--------------|---------------------|------------------------------------------------------------------------------------------|------------------------------------------------------------------------------------------------------------------------------------------------------------------------|
| MSI–                  | 1    | lvPPA       | 100           | 0.75                 | 1            | 0                   | —                                                                                        | slowed rate, syllable segregation, sequencing difficulty, speech initiation difficulty                                                                                 |
|                       | 2    | lvPPA       | 99            | 0.25                 | 0.25         | 0                   | —                                                                                        | syllable segregation                                                                                                                                                   |
|                       | 3    | lvPPA       | 98            | 0.25                 | 0.25         | 0                   | —                                                                                        | slowed rate, speech initiation difficulty                                                                                                                              |
|                       | 4    | lvPPA       | 95            | 1                    | 1            | 0.5                 | —                                                                                        | inconsistent sound distortions, sequencing difficulty                                                                                                                  |
|                       | 5    | lvPPA       | 98            | 1                    | 1.5          | 0.5                 | —                                                                                        | inconsistent sound distortions, sequencing difficulty, syllable segregation                                                                                            |
|                       | 6    | lvPPA       | 96            | 0.25                 | 0.25         | 0                   | —                                                                                        | inconsistent sound distortions, sequencing difficulty, speech initiation difficulty                                                                                    |
|                       | 7    | lvPPA       | 92            | 0.5                  | 0.75         | 0                   | —                                                                                        | slowed rate, speech initiation difficulty, syllable segregation, voice quality                                                                                         |
|                       | 8    | lvPPA       | 99            | 0.75                 | 1.25         | 0.5                 | —                                                                                        | slowed rate, sequencing difficulty, speech initiation difficulty, other prosodic                                                                                       |
|                       | 9    | lvPPA       | 95            | 1.5                  | 1.5          | 0.5                 | —                                                                                        | slowed rate, inconsistent sound distortions, speech initiation difficulty                                                                                              |
| Group Mean (SD), MSI– |      |             | 97.1 (2.6)    | 0.69 (0.49)          | 0.86 (0.64)  | 0.22 (0.43)         | —                                                                                        | Top 5 features (in order) <sup>c</sup> : <b>difficulty sequencing, slowed rate, inconsistent sound distortions, speech initiation difficulty, syllable segregation</b> |
| MSI+                  | 10   | PPAOS       | 91            | 0.75                 | 0.5          | 0.75                | Dys <sup>+</sup>                                                                         | slowed rate, consistent sound distortions<br>consistent, insufficient breath support, prosodic abnormalities                                                           |
|                       | 11   | nfvPPA      | 94            | 1.5                  | 1.5          | 0.5                 | AOS <sup>+</sup>                                                                         | slowed rate, inconsistent sound distortions, syllable segregation                                                                                                      |
|                       | 12   | CBS         | 71            | 2                    | 2            | 0.25                | AOS <sup>+</sup>                                                                         | slowed rate, inconsistent sound distortions, speech initiation difficulty, syllable segregation                                                                        |
|                       | 13   | PSP         | 97            | 0.25                 | 0.25         | 0                   | AOS <sup>+</sup>                                                                         | sequencing difficulty, syllable segregation                                                                                                                            |
|                       | 14   | nfvPPA      | 94            | 0.75                 | 0.75         | 0.25                | AOS <sup>+</sup>                                                                         | slowed rate, inconsistent sound distortions, speech initiation difficulty, voice quality                                                                               |
|                       | 15   | PSP         | 5             | 3                    | 0            | 3                   | Dys <sup>+</sup>                                                                         | slowed rate, speech initiation difficulty, prosodic abnormalities                                                                                                      |

|                                                                                                                                                                                                                                                                                                                                                                                                                                         |    |        |                |                |                |             |                  |                                                                                                                                                                                  |
|-----------------------------------------------------------------------------------------------------------------------------------------------------------------------------------------------------------------------------------------------------------------------------------------------------------------------------------------------------------------------------------------------------------------------------------------|----|--------|----------------|----------------|----------------|-------------|------------------|----------------------------------------------------------------------------------------------------------------------------------------------------------------------------------|
|                                                                                                                                                                                                                                                                                                                                                                                                                                         | 16 | PPAOS  | 100            | 1.5            | 1              | 0.75        | AOS <sup>+</sup> | slowed rate, speech initiation difficulty, syllable segregation, other prosodic, voice quality                                                                                   |
|                                                                                                                                                                                                                                                                                                                                                                                                                                         | 17 | PPAOS  | 98             | 1              | 1              | 0.5         | AOS <sup>+</sup> | slowed rate, inconsistent sound distortions, sequencing difficulty, syllable segregation, other prosodic                                                                         |
|                                                                                                                                                                                                                                                                                                                                                                                                                                         | 18 | PPAOS  | 96             | 1              | 0.75           | 0.75        | =                | inconsistent sound distortions, consistent sound distortions, respiratory difficulty, sequencing difficulty, speech initiation difficulty, syllable segregation                  |
|                                                                                                                                                                                                                                                                                                                                                                                                                                         | 19 | CBS    | 71             | 3              | 2.5            | 3           | Dys <sup>+</sup> | slowed rate, consistent sound distortions, respiratory difficulty, speech initiation difficulty                                                                                  |
|                                                                                                                                                                                                                                                                                                                                                                                                                                         | 20 | nfvPPA | 2              | 3              | 1.5            | 3           | Dys <sup>+</sup> | slowed rate, consistent sound distortions, nasality, syllable segregation                                                                                                        |
| Group Mean ( <i>SD</i> ), MSI+                                                                                                                                                                                                                                                                                                                                                                                                          |    |        | 74.3<br>(36.6) | 1.61<br>(1.01) | 1.07<br>(0.81) | 1.18 (1.19) | —                | Top 5 features (in order) <sup>c</sup> :<br><b>slowed rate, syllable segregation, speech initiation difficulty, inconsistent sound distortions, consistent sound distortions</b> |
| <p>Overall MSI Severity, Apraxia Severity, and Dysarthria Severity are rated according to the following rubric:</p> <p>0 = Normal/no impairment</p> <p>0.5 = questionable/very mild impairment</p> <p>1 = mild impairment</p> <p>2 = moderate impairment</p> <p>3 = severe impairment</p> <p>See Supplemental Material S2 for full operational description of each category. Summary ratings in table are averages across 2 raters.</p> |    |        |                |                |                |             |                  |                                                                                                                                                                                  |

<sup>a</sup>Predominant impairment based on independent auditory-perceptual ratings, rated for the MSI+ group only. Predominance determined from a ratio of mean (across 2 SLP raters) scores for AOS:Dysarthria severity. “AOS+” (i.e., mean rated severity AOS > Dys) indicates predominant apraxic impairment; “Dys+” (i.e., mean rated severity Dys > AOS) indicates predominant dysarthric impairment; “=” (i.e., mean rated severity AOS = Dys) indicates no predominance of either apraxia or dysarthria.

<sup>b</sup>Individual, prespecified features (e.g., slowed rate, consistent sound distortions) were rated per patient as present/absent by clinician raters. Features listed as “salient” are those indicated as present by at least 1 rater.

<sup>c</sup>Top features defined by ranking of total sum of “present” ratings per feature across both raters for the MSI–, MSI+ groups.
