# Supplementary material
Source: publisher figshare collection journal article supplement (https://asha.figshare.com/articles/dataset/_/21401778)
Supplement: Supplementary file 3 [file 1]

### Supplemental Material S3. Example branching logic in REDCap SLP survey.

|                                                                                                                                                                                |                                                                                                                                                                                                                                                                                                                                                                                                                                                                                                                                                                                                                                                                                                                                                                                                                                                                                                                                                                                                                                                                                                                                                                                                                                                                                    |
|--------------------------------------------------------------------------------------------------------------------------------------------------------------------------------|------------------------------------------------------------------------------------------------------------------------------------------------------------------------------------------------------------------------------------------------------------------------------------------------------------------------------------------------------------------------------------------------------------------------------------------------------------------------------------------------------------------------------------------------------------------------------------------------------------------------------------------------------------------------------------------------------------------------------------------------------------------------------------------------------------------------------------------------------------------------------------------------------------------------------------------------------------------------------------------------------------------------------------------------------------------------------------------------------------------------------------------------------------------------------------------------------------------------------------------------------------------------------------|
| <p>Please rate the overall severity of motor speech impairment</p>                                                                                                             | <ul style="list-style-type: none"><li><input type="radio"/> <b>Normal:</b> Speech is natural-sounding, fluent, and effortless. Normal articulation, pitch, loudness, voice quality, resonance, prosody (incl. rate), and respiration.</li><li><input checked="" type="radio"/> <b>Questionable/very mild impairment:</b> Occasional misarticulation and/or effortful or halting speech (not due to word-finding); very mild or inconsistent impairment in pitch, loudness, voice quality, resonance, prosody (incl. rate), or respiration.</li><li><input type="radio"/> <b>Mild impairment:</b> Mild and consistent impairment in articulation, pitch, loudness, voice quality, resonance, prosody (incl. rate), or respiration. May exhibit occasional unintelligible words or utterances.</li><li><input type="radio"/> <b>Moderate impairment:</b> Moderate impairment in articulation, pitch, loudness, voice quality, resonance, prosody (incl. rate), or respiration. Frequent unintelligible words or utterances.</li><li><input type="radio"/> <b>Severe impairment:</b> Severe impairments in articulation, pitch, loudness, voice quality, resonance, prosody (incl. rate), or respiration. The majority of words or phrases are unintelligible.</li></ul> <p>reset</p> |
| <p>Using your clinical judgment, how would you characterize the motor speech impairment?</p> <p><u>You may select more than 1 option to indicate comorbid impairments.</u></p> | <ul style="list-style-type: none"><li><input checked="" type="checkbox"/> apraxia of speech</li><li><input checked="" type="checkbox"/> dysarthria</li><li><input type="checkbox"/> other</li></ul> <p>Choose all options that apply</p>                                                                                                                                                                                                                                                                                                                                                                                                                                                                                                                                                                                                                                                                                                                                                                                                                                                                                                                                                                                                                                           |
| <p>Please rate apraxia of speech severity</p>                                                                                                                                  | <ul style="list-style-type: none"><li><input type="radio"/> questionable/very mild</li><li><input checked="" type="radio"/> mild</li><li><input type="radio"/> moderate</li><li><input type="radio"/> severe</li></ul> <p>reset</p>                                                                                                                                                                                                                                                                                                                                                                                                                                                                                                                                                                                                                                                                                                                                                                                                                                                                                                                                                                                                                                                |
| <p>Please rate dysarthria severity</p>                                                                                                                                         | <ul style="list-style-type: none"><li><input type="radio"/> questionable/very mild</li><li><input checked="" type="radio"/> mild</li><li><input type="radio"/> moderate</li><li><input type="radio"/> severe</li></ul> <p>reset</p>                                                                                                                                                                                                                                                                                                                                                                                                                                                                                                                                                                                                                                                                                                                                                                                                                                                                                                                                                                                                                                                |
