# Supplementary material
Source: publisher figshare collection journal article supplement (https://asha.figshare.com/articles/dataset/_/21401778)

**Supplemental Material S6.** Individual motor speech impairment profiles based on quantitative speech measures, MSI- group.

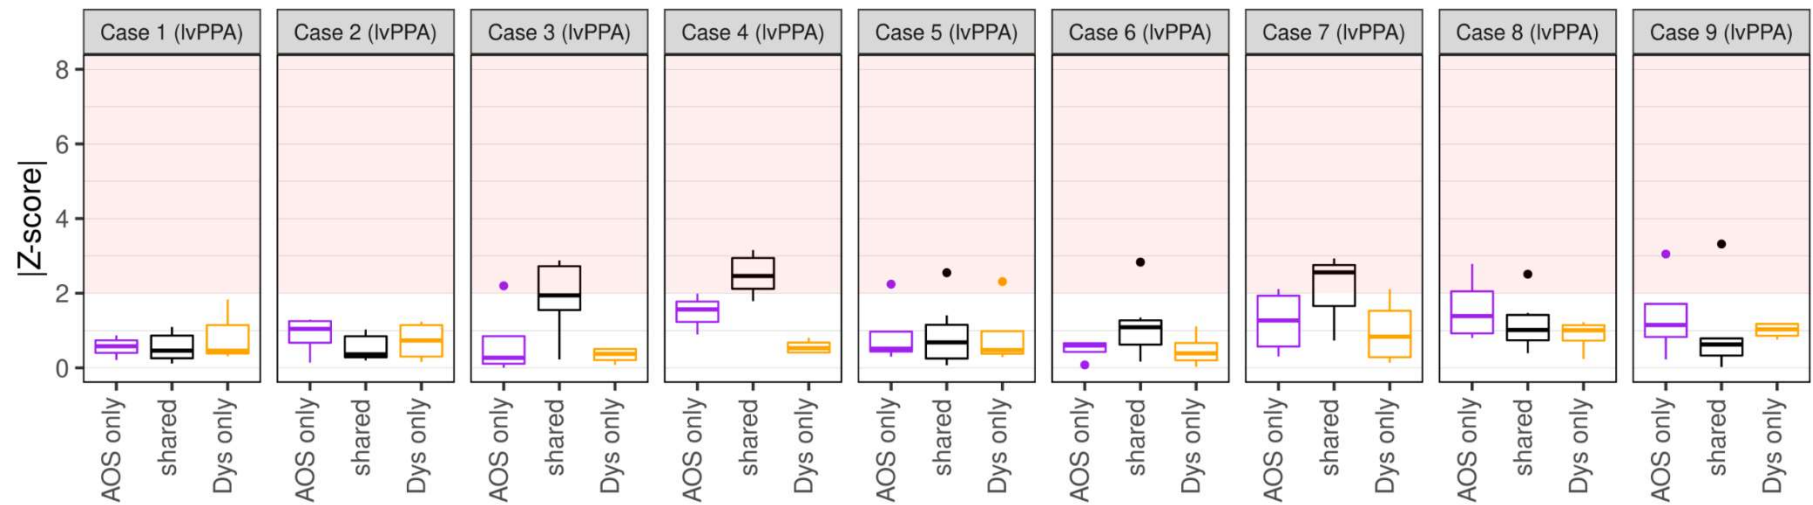

Supplement: Supplementary file 4 [file 1]
