# Supplementary material
Source: publisher figshare collection journal article supplement (https://asha.figshare.com/articles/dataset/_/21401778)

**Supplemental Material S5.** Individual motor speech impairment profiles based on quantitative speech measures, MSI+ group.

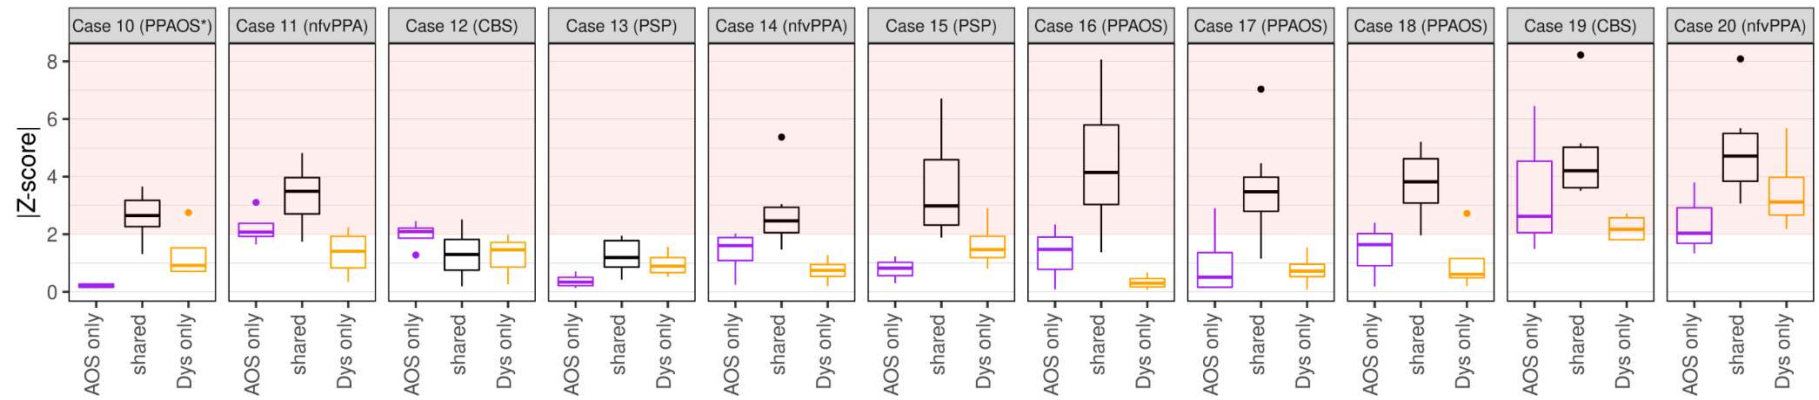

Supplement: Supplementary file 5 [file 1]
