# Supplementary material
Source: publisher figshare collection journal article supplement (https://asha.figshare.com/articles/dataset/_/21401778)
Supplement: Supplementary file 6 [file 1]

# **Supplemental Material S1.** Interrater reliability for all acoustic and kinematic speech variables.

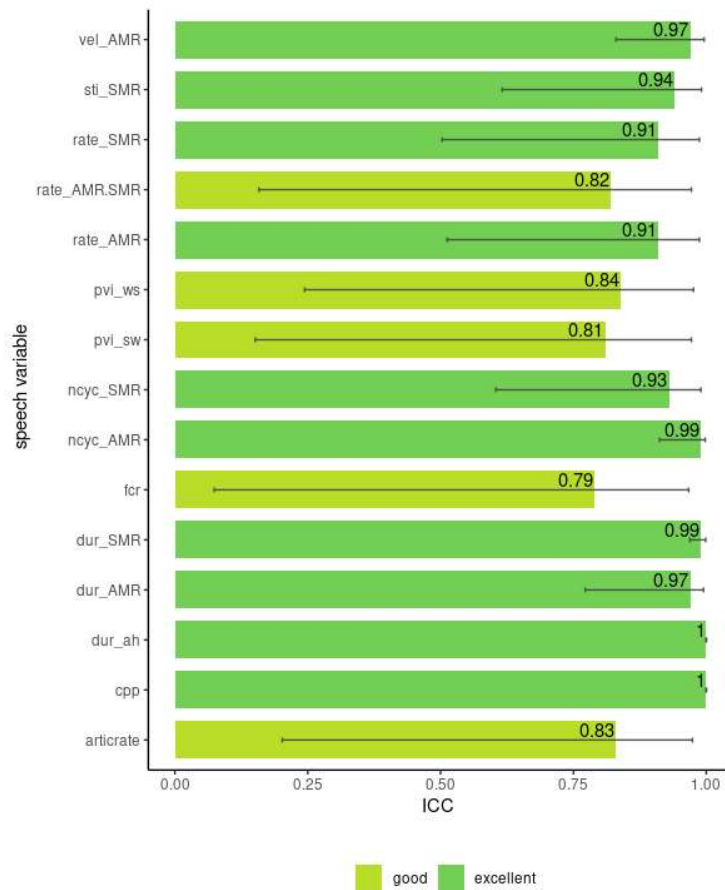

Each row corresponds to a single acoustic or kinematic speech feature. Bars show the intraclass correlation coefficient (ICC) value, type C,1 for two independent raters (20% of sample double-rated for reliability). Error bars show 95% confidence intervals.
